# Supplementary material for: Effect of smoking-related features and 731 immune cell phenotypes on esophageal cancer: a two-sample and mediated Mendelian randomized study
Source: Front Immunol. 2024 Mar 27;15:1336817. doi: 10.3389/fimmu.2024.1336817 (PMC11004242; doi:10.3389/fimmu.2024.1336817)
Supplement: Supplementary file 1 [file Table_1.xlsx]

## Sheet: Summary
Table1: Summary of Mendelian randomization and sensitivity analyses of smoking-related features for esophageal cancer.
Table2: Summary of Mendelian randomization and sensitivity analyses of esophageal cancer for smoking-related features.
Table3: Summary of Mendelian randomization and sensitivity analyses of immune cell phenotype for esophageal cancer(pval_IVW <0.05).
Table4: Summary of Mendelian randomization and sensitivity analyses of immune cell phenotype for esophageal cancer.
Table5：The instrumental variables of Smoking status: Never
Table6：The instrumental variables of smoking initiation
Table7：The instrumental variables of Ever smoked
Table8：The instrumental variables of Current tobacco smoking

## Sheet: Table1
			Inverse variance weighted				Weighted median				MR Egger				MR Egger			Inverse variance weighted			Pleio			MR PRESSO
exposure	outcome	nsnp	pval	or	or_lci95	or_uci95	pval	or	or_lci95	or_uci95	pval	or	or_lci95	or_uci95	Q	Q_df	Q_pval	Q	Q_df	Q_pval	egger_intercept	se	pval	Global Test_pval
Smoking status: Never	Esophageal cancer	67	1.82e-05	0.104486	0.0371953	0.293511	0.0021	0.0845308	0.0175049	0.408196	0.206	0.0534948	0.000599421	4.77409	61.1979	65	0.610796	61.2881	66	0.641283	0.00584561	0.0194727	0.764987	0.559
Ever smoked	Esophageal cancer	69	0.014891	4.30528	1.32947	13.9419	0.238919	2.8593	0.497645	16.4286	0.948245	1.20592	0.00431558	336.978	68.1532	67	0.437776	68.3619	68	0.464875	0.0090148	0.0199046	0.652084	0.61
Smoking initiation	Esophageal cancer	72	0.00194124	1.64649	1.20115	2.25694	0.232153	1.31757	0.838101	2.07135	0.977662	0.976807	0.190099	5.01925	60.572	70	0.781907	60.9779	71	0.796038	0.0137193	0.0215318	0.526097	0.73
Current tobacco smoking	Esophageal cancer	15	0.00393179	19.246	2.57846	143.654	0.0533289	13.611	0.963196	192.337	0.60841	14.4698	0.000673294	310971	10.8329	13	0.624816	10.8362	14	0.698857	0.00269166	0.0470421	0.955242	0.744

## Sheet: Table2
			Inverse variance weighted				Weighted median				MR Egger				MR Egger			Inverse variance weighted			Pleio			MR PRESSO
exposure	outcome	nsnp	pval	or	or_lci95	or_uci95	pval	or	or_lci95	or_uci95	pval	or	or_lci95	or_uci95	Q	Q_df	Q_pval	Q	Q_df	Q_pval	egger_intercept	se	pval	Global Test_pval
Esophageal cancer	Smoking status: Never	4	0.122019	0.99523	0.989216	1.00128	0.0873574	0.993643	0.986403	1.00093	0.567324	1.00618	0.988438	1.02424	0.362022	2	0.834426	2.00625	3	0.57111	-0.00341556	0.00266367	0.328295	0.56
Esophageal cancer	Ever smoked	4	0.822575	1.00129	0.990044	1.01267	0.800979	0.999098	0.992109	1.00614	0.0845084	0.977224	0.963607	0.991034	1.64549	2	0.439225	14.9256	3	0.00188133	0.00785818	0.00215636	0.0677387	0.032
Esophageal cancer	Smoking initiation	4	0.669081	1.00398	0.985857	1.02244	0.525242	1.00743	0.984682	1.0307	0.281422	0.962656	0.914746	1.01307	0.0646273	2	0.968203	3.04279	3	0.385074	0.0133641	0.00774399	0.226537	0.439
Esophageal cancer	Current tobacco smoking	4	0.442017	1.00271	0.995822	1.00964	0.28141	1.00442	0.996388	1.01253	0.465967	1.00925	0.989069	1.02984	1.55385	2	0.459819	2.00451	3	0.571472	-0.00203073	0.00302501	0.571172	0.593

## Sheet: Table3
			Inverse variance weighted				Weighted median				MR Egger				MR Egger			Inverse variance weighted			Pleio			MR PRESSO	Inverse variance weighted
exposure	outcome	nsnp	pval	or	or_lci95	or_uci95	pval	or	or_lci95	or_uci95	pval	or	or_lci95	or_uci95	Q	Q_df	Q_pval	Q	Q_df	Q_pval	egger_intercept	se	pval	Global Test_pval	pval（FDR）
SSC-A on CD8+ T cell	Esophageal cancer	12	0.00120192	1.22961	1.08502	1.39348	0.0189219	1.24685	1.03705	1.49909	0.0075538	1.31476	1.11944	1.54417	8.61724	10	0.568773	10.3031	11	0.503344	-0.0371164	0.0285859	0.223288	0.55	0.0324517
CD28- CD127- CD25++ CD8+ T cell %T cell	Esophageal cancer	9	0.00332267	1.2315	1.07168	1.41514	0.111597	1.16797	0.964636	1.41417	0.15226	1.16224	0.967427	1.39628	6.22306	7	0.513959	7.12061	8	0.523678	0.0247802	0.0261564	0.37499	0.36	0.044856
CD20- B cell %lymphocyte	Esophageal cancer	9	0.00384655	1.07273	1.02286	1.12504	0.0283651	1.06787	1.00698	1.13244	0.276726	1.03837	0.975392	1.10542	2.84382	7	0.899065	5.31373	8	0.723578	0.033318	0.0212001	0.160039	0.72	0.034619
CD3 on CD39+ secreting CD4 regulatory T cell	Esophageal cancer	16	0.00749145	0.880316	0.801792	0.966529	0.381258	0.944866	0.832217	1.07276	0.0855883	0.860165	0.733263	1.00903	11.9688	14	0.608809	12.0918	15	0.672069	0.0077469	0.02209	0.731037	0.52	0.0505673
CD45 on Granulocytic Myeloid-Derived Suppressor Cells	Esophageal cancer	7	0.00827623	0.894813	0.823959	0.971761	0.0876153	0.912919	0.822299	1.01353	0.386816	0.939861	0.826709	1.0685	6.58604	5	0.253291	7.85641	6	0.248813	-0.0288265	0.0293531	0.371171	0.41	0.0446917
HVEM on naive CD8+ T cell	Esophageal cancer	15	0.00893156	1.07681	1.0187	1.13823	0.135626	1.06139	0.981499	1.14778	0.231536	1.05401	0.970888	1.14425	9.74497	13	0.714644	10.224	14	0.745632	0.0120458	0.0174047	0.50105	0.82	0.040192
CD4 on Central Memory CD4+ T cell	Esophageal cancer	7	0.0147971	1.19596	1.03567	1.38106	0.0640719	1.19709	0.989532	1.44817	0.73195	0.921214	0.590944	1.43607	2.90445	5	0.714715	4.38805	6	0.624317	0.0588148	0.0482867	0.277548	0.6	0.0570745
CCR2 on monocyte	Esophageal cancer	12	0.0166304	0.846868	0.739156	0.970275	0.0373122	0.840816	0.714209	0.989866	0.329524	0.820992	0.563036	1.19713	15.4906	10	0.115172	15.5376	11	0.159184	0.00879617	0.0505071	0.865217	0.18	0.0561276
CD25 on IgD- CD27- B cell	Esophageal cancer	13	0.0192598	1.1192	1.01848	1.22989	0.0752434	1.13988	0.986766	1.31675	0.0213728	1.22595	1.05631	1.42282	7.01491	11	0.797875	9.41428	12	0.667197	-0.0319985	0.0206576	0.149658	0.47	0.0577795
CD25 on IgD+ CD24- B cell	Esophageal cancer	15	0.0196361	1.09008	1.01389	1.17199	0.0148625	1.12927	1.02403	1.24532	0.0222139	1.12262	1.02871	1.2251	8.86637	13	0.782959	10.2616	14	0.742821	-0.0224864	0.0190372	0.25869	0.69	0.0530175
Naive CD4-CD8- T cell Absolute Count	Esophageal cancer	9	0.0204678	1.16765	1.02421	1.33119	0.0664156	1.1821	0.988727	1.41329	0.283832	1.15179	0.907263	1.46221	5.58367	7	0.589112	5.60175	8	0.691743	0.0036503	0.0271437	0.896808	0.91	0.050239
CD28- CD4-CD8- T cell Absolute Count	Esophageal cancer	15	0.0206651	0.874005	0.779787	0.979607	0.0443677	0.844297	0.715881	0.99575	0.103308	0.846484	0.702498	1.01998	7.25006	13	0.888809	7.43085	14	0.916825	0.00858895	0.0202	0.677649	0.91	0.0464966
CD28 on resting CD4 regulatory T cell	Esophageal cancer	16	0.0223508	0.892286	0.809164	0.983948	0.210196	0.920956	0.809656	1.04756	0.215786	0.891966	0.750384	1.06026	5.21821	14	0.982538	5.21823	15	0.990112	0.000102783	0.0208139	0.99613	0.99	0.046421
CD11c on CD62L+ myeloid Dendritic Cell	Esophageal cancer	17	0.0226053	0.875223	0.780481	0.981466	0.0470641	0.850051	0.724108	0.997898	0.182602	0.833424	0.645472	1.0761	12.1394	15	0.668452	12.3156	16	0.72198	0.0132875	0.0316466	0.680531	0.64	0.043596
CD20 on IgD+ CD24- B cell	Esophageal cancer	20	0.024092	1.07856	1.00996	1.15183	0.0552549	1.09772	0.997904	1.20753	0.0229895	1.12769	1.02573	1.23977	12.3447	18	0.828942	13.9796	19	0.784882	-0.0169184	0.0132317	0.21727	0.74	0.0433656
Monocytic Myeloid-Derived Suppressor Cells Absolute Count	Esophageal cancer	13	0.0245135	1.09276	1.01146	1.1806	0.0471147	1.10449	1.00127	1.21836	0.068817	1.20176	1.00517	1.43679	6.53826	11	0.83515	7.87744	12	0.794633	-0.0310737	0.0268517	0.271689	0.77	0.0413666
CD8+ Natural Killer T Absolute Count	Esophageal cancer	13	0.0251449	1.17246	1.02003	1.34766	0.459715	1.07352	0.889469	1.29565	0.408636	1.13909	0.846287	1.5332	5.67235	11	0.894307	5.71884	12	0.929587	0.00561043	0.0260208	0.833235	0.95	0.039936
CD4+ CD8dim T cell %leukocyte	Esophageal cancer	12	0.0271674	1.17413	1.01827	1.35385	0.0752195	1.18649	0.982765	1.43245	0.45489	1.19236	0.765207	1.85797	9.76189	10	0.461626	9.76706	11	0.551454	-0.00292649	0.040704	0.944102	0.65	0.0407512
CD4+ CD8dim T cell %lymphocyte	Esophageal cancer	11	0.0299883	1.17225	1.01552	1.35318	0.126513	1.15961	0.958997	1.4022	0.434345	1.20906	0.767278	1.90522	9.90451	9	0.358271	9.92646	10	0.446969	-0.00620035	0.0439038	0.890802	0.53	0.042615
CD3 on Central Memory CD8+ T cell	Esophageal cancer	8	0.0312917	0.859667	0.749129	0.986515	0.416411	0.93424	0.792884	1.1008	0.67282	0.93834	0.708373	1.24296	4.23536	6	0.64486	4.72552	7	0.693418	-0.0238451	0.0340588	0.510077	0.59	0.0422438
HLA DR on CD33dim HLA DR+ CD11b+	Esophageal cancer	14	0.0335589	1.07221	1.00544	1.14342	0.0701446	1.07297	0.994221	1.15795	0.407146	1.04586	0.944158	1.15851	16.0462	12	0.189129	16.5657	13	0.219927	0.0130988	0.0210159	0.544767	0.19	0.0431471
CD27 on CD20- CD38- B cell	Esophageal cancer	11	0.0354562	0.893383	0.80428	0.992358	0.158081	0.906784	0.791583	1.03875	0.1773	0.894019	0.769482	1.03871	10.8807	9	0.283976	10.8809	10	0.366871	-0.000290446	0.0210586	0.989297	0.53	0.0435144
CD62L- plasmacytoid Dendritic Cell Absolute Count	Esophageal cancer	13	0.0370104	0.892719	0.802414	0.993187	0.0027073	0.818372	0.717897	0.932908	0.0149836	0.791485	0.675019	0.928045	12.3393	11	0.338684	16.2608	12	0.17958	0.0417867	0.0223492	0.0883565	0.17	0.043447
CD25 on IgD+ CD38dim B cell	Esophageal cancer	17	0.0422932	1.08455	1.00283	1.17293	0.221472	1.07318	0.958299	1.20183	0.0940788	1.09434	0.991337	1.20804	9.96909	15	0.82168	10.0544	16	0.863771	-0.00562479	0.019255	0.774195	0.83	0.0475799
CD28+ CD45RA+ CD8+ T cell %T cell	Esophageal cancer	85	0.043796	0.992855	0.985958	0.999801	0.328218	0.994391	0.98324	1.00567	0.264909	0.99525	0.987009	1.00356	65.4809	83	0.921687	66.5668	84	0.919068	-0.0128226	0.0123047	0.300397	0.94	0.0472997
CD19 on transitional B cell	Esophageal cancer	17	0.044312	0.926481	0.860035	0.998061	0.137301	0.92824	0.841399	1.02404	0.222784	0.938212	0.850387	1.03511	8.785	15	0.888488	8.93258	16	0.916164	-0.00649998	0.0169201	0.706253	0.98	0.0460163
CD80 on granulocyte	Esophageal cancer	23	0.0455016	0.914896	0.838524	0.998223	0.0986748	0.894689	0.78399	1.02102	0.328933	0.915085	0.768933	1.08902	21.0554	21	0.455563	21.0554	22	0.517314	-5.52019e-05	0.0204388	0.997871	0.58	0.0455016

## Sheet: Table4
			Inverse variance weighted				Weighted median				MR Egger				MR Egger			Inverse variance weighted			Pleio			MR PRESSO
outcome	exposure	nsnp	pval	or	or_lci95	or_uci95	pval	or	or_lci95	or_uci95	pval	or	or_lci95	or_uci95	Q	Q_df	Q_pval	Q	Q_df	Q_pval	egger_intercept	se	pval	Global Test_pval
Smoking status: Never	SSC-A on CD8+ T cell	71	0.00106627	0.244276	0.105016	0.568206	0.0230371	0.265089	0.0843616	0.832988	0.788597	1.71598	0.0336449	87.5198	83.0048	69	0.119842	84.1957	70	0.118491	-0.016709	0.0167933	0.323222	0.1153
Smoking status: Never	CD25 on IgD+ CD24- B cell	71	0.00486994	3.17516	1.42058	7.09687	0.0838677	2.9303	0.866002	9.91527	0.929291	0.843495	0.0199235	35.7109	60.6112	69	0.754242	61.1156	70	0.766761	0.0113638	0.016001	0.479977	0.7648
Smoking status: Never	CD25 on IgD+ CD38dim B cell	71	0.0228233	2.56018	1.13958	5.75172	0.536579	1.4696	0.433429	4.98289	0.919653	0.823089	0.0189893	35.6767	65.7991	69	0.586984	66.1642	70	0.607828	0.00972776	0.0161007	0.547704	0.6084
Smoking status: Never	CD28+ CD45RA+ CD8+ T cell %T cell	71	0.0355722	2.0182	1.04851	3.88468	0.246994	1.67028	0.700805	3.98092	0.373696	4.07361	0.188247	88.1519	90.2882	69	0.0437288	90.5631	70	0.0497659	-0.00600561	0.0131022	0.648129	0.0489
Smoking status: Never	CD27 on CD20- CD38- B cell	71	0.0373338	0.438505	0.201811	0.952808	0.0531253	0.337432	0.112203	1.01477	0.633688	0.412689	0.0110082	15.4713	53.3631	69	0.917666	53.3642	70	0.930341	0.000520254	0.0154857	0.973296	0.9332
Smoking status: Never	CD25 on IgD- CD27- B cell	71	0.0398621	2.45551	1.04248	5.78384	0.306161	1.88698	0.559211	6.36739	0.573781	0.316572	0.00586361	17.0915	79.6802	69	0.17822	80.9068	70	0.175272	0.0175617	0.0170396	0.306309	0.175
Smoking status: Never	CD62L- plasmacytoid Dendritic Cell Absolute Count	69	0.0420932	0.433665	0.193762	0.9706	0.0889227	0.339678	0.0978966	1.1786	0.296492	0.1337	0.00315	5.67487	68.584	67	0.423365	68.9905	68	0.443673	0.010073	0.0159848	0.53073	0.452
Smoking status: Never	CD20- B cell %lymphocyte	71	0.0636709	2.12016	0.95814	4.69146	0.210276	2.16061	0.647347	7.2113	0.308187	6.95836	0.171398	282.493	60.775	69	0.749438	61.1896	70	0.764661	-0.0101833	0.0158149	0.52177	0.7688
Smoking status: Never	CD3 on CD39+ secreting CD4 regulatory T cell	71	0.0970647	2.11169	0.873292	5.10623	0.200509	2.38847	0.629753	9.05876	0.214067	13.8831	0.227409	847.556	65.8286	69	0.585977	66.6734	70	0.590612	-0.0161385	0.0175582	0.361224	0.6023
Smoking status: Never	CD4+ CD8dim T cell %leukocyte	71	0.120138	0.529303	0.237283	1.18071	0.253528	0.521433	0.170512	1.59457	0.0532545	0.0233615	0.000552666	0.987499	50.5651	69	0.953302	53.362	70	0.930371	0.0267011	0.0159658	0.0989762	0.9353
Smoking status: Never	CD28- CD127- CD25++ CD8+ T cell %T cell	71	0.130807	1.88294	0.828541	4.27916	0.816598	1.15063	0.351538	3.76614	0.687261	0.453326	0.00978644	20.9989	59.5783	69	0.783565	60.1332	70	0.793773	0.0121946	0.0163705	0.458853	0.8016
Smoking status: Never	CD4+ CD8dim T cell %lymphocyte	71	0.133743	0.542524	0.243937	1.20659	0.151529	0.431578	0.13687	1.36085	0.0519704	0.0232017	0.000556649	0.967073	53.5878	69	0.914163	56.463	70	0.879023	0.026971	0.015906	0.0944602	0.8842
Smoking status: Never	HVEM on naive CD8+ T cell	71	0.143659	0.380561	0.104242	1.38933	0.345725	0.394222	0.0569409	2.72935	0.668972	0.2632	0.000594508	116.524	64.4661	69	0.632181	64.4809	70	0.663687	0.00315519	0.0259925	0.903736	0.6708
Smoking status: Never	CCR2 on monocyte	71	0.164833	0.503894	0.191563	1.32545	0.367011	0.524981	0.129446	2.12912	0.502822	4.69613	0.0521345	423.014	79.4503	69	0.182897	80.591	70	0.181603	-0.0191257	0.0192155	0.323055	0.1787
Smoking status: Never	CD20 on IgD+ CD24- B cell	71	0.18817	1.71033	0.76903	3.80377	0.907139	0.931979	0.285332	3.04412	0.707655	2.04473	0.0494064	84.6227	62.1106	69	0.708817	62.1199	70	0.737559	-0.00153097	0.0159044	0.923592	0.738
Smoking status: Never	CD8+ Natural Killer T Absolute Count	71	0.199737	0.552823	0.223423	1.36787	0.614603	0.726241	0.209082	2.52258	0.00158183	0.00122976	2.26932e-05	0.0666411	76.6274	69	0.247277	87.0944	70	0.0812369	0.0522706	0.0170261	0.00305982	0.0732
Smoking status: Never	CD80 on granulocyte	71	0.241308	0.583073	0.236502	1.43751	0.408757	0.578925	0.158274	2.11755	0.892529	1.33712	0.0200685	89.0896	61.252	69	0.735214	61.4093	70	0.758377	-0.00711189	0.0179293	0.69284	0.764
Smoking status: Never	CD28- CD4-CD8- T cell Absolute Count	71	0.247411	0.605576	0.258849	1.41674	0.774491	0.833378	0.239508	2.89978	0.857624	1.44286	0.0266781	78.0352	73.6935	69	0.32733	73.8971	70	0.352133	-0.00742798	0.0170147	0.663792	0.3608
Smoking status: Never	CD3 on Central Memory CD8+ T cell	71	0.329758	1.57042	0.633597	3.8924	0.619643	1.41244	0.36122	5.52293	0.258075	11.7112	0.17059	803.988	76.2002	69	0.258128	77.2041	70	0.259445	-0.0172168	0.0180575	0.343696	0.2591
Smoking status: Never	CD45 on Granulocytic Myeloid-Derived Suppressor Cells	71	0.361065	1.90254	0.478509	7.56448	0.576505	1.7616	0.241499	12.8499	0.863123	0.565546	0.000888763	359.873	78.5038	69	0.203053	78.6656	70	0.223629	0.0104062	0.0275914	0.707217	0.2203
Smoking status: Never	CD4 on Central Memory CD4+ T cell	71	0.420811	0.643108	0.219536	1.88392	0.855054	0.880995	0.226238	3.43069	0.492177	5.84749	0.0389049	878.891	99.6866	69	0.00921006	100.815	70	0.00932918	-0.0189146	0.0214025	0.379895	0.0107
Smoking status: Never	CD11c on CD62L+ myeloid Dendritic Cell	71	0.425125	1.46851	0.571187	3.7755	0.724536	1.26844	0.337984	4.76044	0.600591	0.306125	0.00371665	25.2142	82.3993	69	0.129219	83.007	70	0.13713	0.0134354	0.0188339	0.478027	0.1358
Smoking status: Never	Naive CD4-CD8- T cell Absolute Count	71	0.447249	1.30247	0.658854	2.57483	0.871868	0.920629	0.337003	2.51499	0.184744	8.73948	0.366489	208.406	72.4514	69	0.364821	73.9744	70	0.3498	-0.0162824	0.0135199	0.23258	0.3617
Smoking status: Never	Monocytic Myeloid-Derived Suppressor Cells Absolute Count	71	0.526717	0.704227	0.237791	2.0856	0.389805	0.495027	0.0996881	2.45818	0.752332	0.441269	0.00279712	69.614	56.9622	69	0.849332	56.9965	70	0.868265	0.00400255	0.0215954	0.853504	0.8677
Smoking status: Never	HLA DR on CD33dim HLA DR+ CD11b+	71	0.717984	1.26767	0.349937	4.59221	0.818556	1.23863	0.199005	7.70934	0.772553	0.410574	0.00100465	167.79	84.0161	69	0.105359	84.1885	70	0.118598	0.00966676	0.0256876	0.707834	0.116
Smoking status: Never	CD28 on resting CD4 regulatory T cell	71	0.971619	1.01618	0.419799	2.45978	0.159439	2.51465	0.695958	9.08595	0.172598	0.055378	0.000903993	3.39242	56.2422	69	0.865102	58.2557	70	0.840626	0.0249315	0.0175702	0.160412	0.8383
Smoking status: Never	CD19 on transitional B cell	71	0.999223	1.00045	0.407035	2.45899	0.827786	0.871845	0.253404	2.99962	0.068897	48.3838	0.790388	2961.82	83.0707	69	0.118854	87.3795	70	0.0781503	-0.0332534	0.0175774	0.062711	0.0755

## Sheet: Table5
exposure	samplesize	SNP	chr	pos	effect_allele	other_allele	pval	beta	se	eaf	FSTAT
Smoking status: Never || id:ukb-d-20116_0	359706	rs10173733	2	51400031	C	G	3.69922e-08	-0.00651484	0.00118349	0.403024	30.3023
Smoking status: Never || id:ukb-d-20116_0	359706	rs10193706	2	146316319	C	A	8.25468e-24	-0.0117667	0.00116951	0.52527	101.228
Smoking status: Never || id:ukb-d-20116_0	359706	rs10233018	7	117523709	G	A	4.5941e-11	-0.00765512	0.00116273	0.504194	43.3455
Smoking status: Never || id:ukb-d-20116_0	359706	rs10274594	7	3463561	G	T	1.92886e-11	0.00783264	0.00116705	0.49589	45.0438
Smoking status: Never || id:ukb-d-20116_0	359706	rs1029986	2	60526817	T	C	4.26521e-09	-0.00702078	0.00119529	0.584921	34.5002
Smoking status: Never || id:ukb-d-20116_0	359706	rs10774625	12	111910219	G	A	1.12463e-10	0.00748682	0.00116086	0.504146	41.5942
Smoking status: Never || id:ukb-d-20116_0	359706	rs10813628	9	3176796	C	T	3.99991e-09	-0.00687611	0.00116854	0.515133	34.6255
Smoking status: Never || id:ukb-d-20116_0	359706	rs10897561	11	79898660	C	T	4.49738e-08	-0.00669175	0.0012233	0.356457	29.9234
Smoking status: Never || id:ukb-d-20116_0	359706	rs10905461	10	8803551	C	T	4.76354e-08	0.00727309	0.00133206	0.744192	29.8118
Smoking status: Never || id:ukb-d-20116_0	359706	rs10914684	1	33795572	A	G	4.57236e-10	0.00773564	0.00124102	0.323978	38.8537
Smoking status: Never || id:ukb-d-20116_0	359706	rs10956808	8	92775372	G	T	1.03729e-10	0.00762466	0.00117999	0.422245	41.7524
Smoking status: Never || id:ukb-d-20116_0	359706	rs11103667	9	137978360	T	C	7.02571e-09	-0.00860468	0.00148601	0.19203	33.5292
Smoking status: Never || id:ukb-d-20116_0	359706	rs11127913	3	85987108	C	T	6.18443e-12	0.00818013	0.00118974	0.390179	47.2731
Smoking status: Never || id:ukb-d-20116_0	359706	rs11429972	1	44096568	ATT	A	1.94805e-11	0.00831478	0.00123915	0.664198	45.0248
Smoking status: Never || id:ukb-d-20116_0	359706	rs11611651	12	133380790	A	G	5.1663e-09	-0.0119868	0.00205187	0.0877105	34.1275
Smoking status: Never || id:ukb-d-20116_0	359706	rs11631530	15	52100215	T	C	2.76701e-08	-0.00998634	0.0017975	0.118063	30.8654
Smoking status: Never || id:ukb-d-20116_0	359706	rs11646575	16	69567781	A	G	2.0017e-12	-0.00824462	0.00117201	0.438738	49.4853
Smoking status: Never || id:ukb-d-20116_0	359706	rs11693702	2	162802184	A	T	5.92243e-12	-0.00802543	0.00116619	0.466348	47.3582
Smoking status: Never || id:ukb-d-20116_0	359706	rs117435980	9	38268287	C	G	5.01753e-09	-0.00920368	0.00157416	0.163387	34.184
Smoking status: Never || id:ukb-d-20116_0	359706	rs12042107	1	91196176	C	T	8.52982e-10	0.00717593	0.00116969	0.549855	37.6368
Smoking status: Never || id:ukb-d-20116_0	359706	rs12244388	10	104640052	A	G	2.08593e-17	-0.0104344	0.00122912	0.336295	72.0683
Smoking status: Never || id:ukb-d-20116_0	359706	rs12450028	17	2207425	T	C	7.32437e-09	-0.00706256	0.00122117	0.34473	33.448
Smoking status: Never || id:ukb-d-20116_0	359706	rs12479064	2	100046038	T	C	4.36034e-08	-0.00803624	0.00146761	0.208302	29.9835
Smoking status: Never || id:ukb-d-20116_0	359706	rs12487411	3	34422170	A	G	1.18623e-10	0.00750479	0.00116511	0.472062	41.4897
Smoking status: Never || id:ukb-d-20116_0	359706	rs12608052	18	49803160	T	C	6.47635e-09	0.00675418	0.00116369	0.51967	33.6875
Smoking status: Never || id:ukb-d-20116_0	359706	rs12725407	1	216931077	C	G	3.71569e-08	0.00813858	0.00147867	0.191041	30.2937
Smoking status: Never || id:ukb-d-20116_0	359706	rs12886628	14	29490300	C	G	8.33624e-09	-0.00710101	0.00123246	0.664616	33.1965
Smoking status: Never || id:ukb-d-20116_0	359706	rs12910916	15	47675655	T	C	2.17495e-10	-0.00901384	0.00141981	0.212134	40.3048
Smoking status: Never || id:ukb-d-20116_0	359706	rs13100688	3	34510754	C	T	1.67614e-09	0.00726633	0.00120571	0.372962	36.3197
Smoking status: Never || id:ukb-d-20116_0	359706	rs1492546	2	81013736	G	C	4.08865e-09	-0.00688013	0.00116995	0.550389	34.5825
Smoking status: Never || id:ukb-d-20116_0	359706	rs1499982	3	117820386	T	C	3.00193e-12	-0.0114648	0.00164302	0.851277	48.6906
Smoking status: Never || id:ukb-d-20116_0	359706	rs1549213	5	166996936	C	G	1.9494e-12	0.00852701	0.00121151	0.641453	49.5378
Smoking status: Never || id:ukb-d-20116_0	359706	rs1561195	9	86700178	A	C	3.00815e-11	-0.00789474	0.00118783	0.522672	44.1738
Smoking status: Never || id:ukb-d-20116_0	359706	rs1565735	8	27426077	A	T	1.86724e-15	0.0115901	0.00145783	0.201566	63.206
Smoking status: Never || id:ukb-d-20116_0	359706	rs16951001	15	67854241	T	G	2.15581e-08	-0.00660348	0.00117938	0.418602	31.3499
Smoking status: Never || id:ukb-d-20116_0	359706	rs17003752	4	80322959	G	A	6.58021e-09	0.0098606	0.00169968	0.138688	33.6566
Smoking status: Never || id:ukb-d-20116_0	359706	rs17151637	8	10153082	T	C	6.11604e-09	0.00751119	0.00129198	0.281244	33.799
Smoking status: Never || id:ukb-d-20116_0	359706	rs1899896	8	93201036	T	C	3.55566e-10	-0.00799277	0.00127424	0.297575	39.345
Smoking status: Never || id:ukb-d-20116_0	359706	rs2240294	7	96624257	A	T	2.56065e-09	0.00695656	0.00116766	0.443692	35.4939
Smoking status: Never || id:ukb-d-20116_0	359706	rs2416770	9	102160601	T	C	2.71013e-08	-0.00648883	0.0011672	0.53106	30.9058
Smoking status: Never || id:ukb-d-20116_0	359706	rs264974	2	104268285	A	T	1.17058e-15	0.00931111	0.00116275	0.486284	64.1251
Smoking status: Never || id:ukb-d-20116_0	359706	rs2675609	10	63636531	C	T	1.36144e-11	0.00815862	0.00120651	0.627493	45.7266
Smoking status: Never || id:ukb-d-20116_0	359706	rs2797116	1	72997261	C	T	1.65951e-09	0.00791361	0.00131276	0.267201	36.3393
Smoking status: Never || id:ukb-d-20116_0	359706	rs2867749	11	59233233	A	C	2.57632e-08	0.00694461	0.0012472	0.318854	31.0042
Smoking status: Never || id:ukb-d-20116_0	359706	rs299688	1	8352039	T	G	2.94598e-08	-0.00727214	0.00131154	0.715841	30.7439
Smoking status: Never || id:ukb-d-20116_0	359706	rs326341	3	107811142	A	G	1.7408e-08	0.00658089	0.00116763	0.476014	31.7655
Smoking status: Never || id:ukb-d-20116_0	359706	rs35891966	11	20129311	A	G	4.55617e-11	0.0147752	0.00224378	0.0721131	43.3614
Smoking status: Never || id:ukb-d-20116_0	359706	rs379525	12	125788119	T	C	4.96169e-08	-0.00649056	0.00119032	0.48132	29.7327
Smoking status: Never || id:ukb-d-20116_0	359706	rs42417	5	94198290	T	C	2.54367e-08	-0.00703306	0.00126258	0.690191	31.029
Smoking status: Never || id:ukb-d-20116_0	359706	rs4566215	17	50209317	C	A	1.62028e-08	0.00662191	0.00117234	0.532626	31.9049
Smoking status: Never || id:ukb-d-20116_0	359706	rs4910656	11	4662087	C	T	2.47474e-08	0.00684378	0.00122755	0.341569	31.0822
Smoking status: Never || id:ukb-d-20116_0	359706	rs4957528	5	106420589	C	A	4.57889e-09	-0.00847499	0.00144577	0.791955	34.3619
Smoking status: Never || id:ukb-d-20116_0	359706	rs523528	11	132212816	T	C	1.29509e-11	0.00807083	0.00119225	0.585719	45.8247
Smoking status: Never || id:ukb-d-20116_0	359706	rs528301	2	45154908	A	G	1.77092e-13	-0.00860082	0.00116774	0.552033	54.2482
Smoking status: Never || id:ukb-d-20116_0	359706	rs55921136	1	210359333	C	T	2.92981e-09	0.00859503	0.00144804	0.203088	35.2315
Smoking status: Never || id:ukb-d-20116_0	359706	rs568599	11	121536011	C	G	8.70683e-09	-0.00670268	0.00116481	0.542795	33.1119
Smoking status: Never || id:ukb-d-20116_0	359706	rs5850689	3	85586903	TG	T	6.31684e-23	0.0119733	0.00121447	0.633538	97.1967
Smoking status: Never || id:ukb-d-20116_0	359706	rs60745548	12	69626823	TC	T	4.53472e-08	0.00719455	0.00131557	0.726626	29.9073
Smoking status: Never || id:ukb-d-20116_0	359706	rs6141314	20	31093514	A	G	3.39727e-09	-0.00806157	0.00136376	0.242466	34.9431
Smoking status: Never || id:ukb-d-20116_0	359706	rs6265	11	27679916	T	C	7.61027e-12	0.0101598	0.00148406	0.188685	46.8668
Smoking status: Never || id:ukb-d-20116_0	359706	rs6433897	2	182034448	C	T	4.2458e-08	-0.00723535	0.00132022	0.736673	30.0348
Smoking status: Never || id:ukb-d-20116_0	359706	rs6676022	1	154162503	T	C	7.18787e-11	0.0115926	0.00177885	0.121622	42.4698
Smoking status: Never || id:ukb-d-20116_0	359706	rs6690680	1	5701154	C	T	3.07872e-08	0.00884091	0.00159669	0.157765	30.6585
Smoking status: Never || id:ukb-d-20116_0	359706	rs6828849	4	173077123	T	A	1.27829e-08	0.00671224	0.00117985	0.417408	32.3652
Smoking status: Never || id:ukb-d-20116_0	359706	rs72505558	7	158113215	G	A	1.3888e-08	0.00674371	0.00118834	0.39864	32.2043
Smoking status: Never || id:ukb-d-20116_0	359706	rs72678864	4	112422145	A	G	1.96911e-10	0.00975375	0.00153266	0.173833	40.4995
Smoking status: Never || id:ukb-d-20116_0	359706	rs7333559	13	100546450	A	G	2.05329e-08	0.00805229	0.00143597	0.790323	31.4446
Smoking status: Never || id:ukb-d-20116_0	359706	rs7451586	6	67550670	G	C	2.35012e-08	-0.00667322	0.00119503	0.404804	31.1825
Smoking status: Never || id:ukb-d-20116_0	359706	rs748828	4	147879993	T	C	2.25684e-11	0.00862128	0.00128896	0.283101	44.7365
Smoking status: Never || id:ukb-d-20116_0	359706	rs7528604	1	66407352	A	G	5.37391e-09	0.00686585	0.00117661	0.433285	34.0503
Smoking status: Never || id:ukb-d-20116_0	359706	rs7567570	2	615140	C	T	2.58232e-09	-0.00913239	0.00153323	0.826905	35.4774
Smoking status: Never || id:ukb-d-20116_0	359706	rs763053	16	735921	C	T	7.91097e-09	0.00806179	0.00139707	0.224572	33.2985
Smoking status: Never || id:ukb-d-20116_0	359706	rs76608582	19	4474725	A	C	1.61154e-10	0.0182891	0.00286008	0.0477092	40.8908
Smoking status: Never || id:ukb-d-20116_0	359706	rs772921	12	56403577	T	C	2.74075e-09	0.00727251	0.00122298	0.343109	35.3612
Smoking status: Never || id:ukb-d-20116_0	359706	rs77878475	16	18058548	A	T	4.69224e-09	0.012595	0.00215009	0.0858303	34.3147
Smoking status: Never || id:ukb-d-20116_0	359706	rs7870475	9	128134034	C	T	6.33228e-10	-0.00718996	0.00116303	0.474294	38.2181
Smoking status: Never || id:ukb-d-20116_0	359706	rs7948789	11	112839532	G	A	1.33045e-41	-0.0161713	0.00119667	0.386092	182.616
Smoking status: Never || id:ukb-d-20116_0	359706	rs883403	7	99047978	C	T	4.55187e-09	0.00942401	0.00160739	0.154118	34.3737
Smoking status: Never || id:ukb-d-20116_0	359706	rs9375371	6	98751680	A	G	1.7382e-08	-0.00739626	0.00131224	0.268873	31.7684
Smoking status: Never || id:ukb-d-20116_0	359706	rs9381917	6	50911334	A	G	4.4727e-09	0.0112569	0.00191907	0.102086	34.4075
Smoking status: Never || id:ukb-d-20116_0	359706	rs9423279	10	125680419	G	C	7.58473e-10	0.0076695	0.00124635	0.656668	37.8662
Smoking status: Never || id:ukb-d-20116_0	359706	rs9487626	6	111716868	T	C	3.06902e-18	0.0131029	0.00150447	0.817783	75.8517
Smoking status: Never || id:ukb-d-20116_0	359706	rs9835772	3	85766025	T	A	8.31362e-09	-0.00780241	0.00135409	0.242802	33.2017

## Sheet: Table6
exposure	samplesize.exposure	SNP	chr	pos	effect_allele.exposure	other_allele.exposure	pval	beta	se	eaf	FSTAT
Ever smoked || id:ukb-b-20261	461066	rs10179482	2	81004626	A	G	9.90011e-09	0.00577322	0.00100719	0.485465	32.8558
Ever smoked || id:ukb-b-20261	461066	rs10212155	3	117785505	A	G	3.40017e-13	0.0103549	0.0014227	0.852761	52.9741
Ever smoked || id:ukb-b-20261	461066	rs10233018	7	117523709	G	A	9.20026e-15	0.00778877	0.00100495	0.503991	60.0685
Ever smoked || id:ukb-b-20261	461066	rs1040070	1	74977870	C	G	6.19998e-09	-0.00591365	0.00101745	0.568297	33.7818
Ever smoked || id:ukb-b-20261	461066	rs10774625	12	111910219	G	A	5.00035e-11	-0.00659074	0.00100322	0.503725	43.1593
Ever smoked || id:ukb-b-20261	461066	rs10863714	1	208710593	G	A	1e-08	-0.00581572	0.00101584	0.576592	32.7759
Ever smoked || id:ukb-b-20261	461066	rs10952199	7	1665339	T	C	1.39991e-11	-0.00687133	0.00101666	0.426753	45.6802
Ever smoked || id:ukb-b-20261	461066	rs10956808	8	92775372	G	T	4.70002e-11	-0.00671424	0.00102021	0.422058	43.3124
Ever smoked || id:ukb-b-20261	461066	rs10988799	9	102158106	T	C	3.59998e-09	0.00594728	0.00100781	0.528587	34.8239
Ever smoked || id:ukb-b-20261	461066	rs11165623	1	96893000	A	G	4.39997e-08	0.00549631	0.00100408	0.504402	29.9643
Ever smoked || id:ukb-b-20261	461066	rs1124639	2	200775744	C	T	6.70039e-11	0.00659743	0.00101067	0.554782	42.6117
Ever smoked || id:ukb-b-20261	461066	rs1150023	10	9360823	C	A	1.6e-08	-0.00645478	0.00114314	0.737332	31.8832
Ever smoked || id:ukb-b-20261	461066	rs1174864	7	53127559	A	G	8.40001e-10	0.00620597	0.00101121	0.550251	37.6647
Ever smoked || id:ukb-b-20261	461066	rs12209519	6	67549140	G	A	2.90001e-08	0.00569138	0.0010262	0.408089	30.7588
Ever smoked || id:ukb-b-20261	461066	rs12244388	10	104640052	A	G	6.79986e-16	0.00856683	0.00106104	0.338891	65.1891
Ever smoked || id:ukb-b-20261	461066	rs12272735	11	7950024	G	A	1.79999e-08	0.00578069	0.00102721	0.392103	31.6693
Ever smoked || id:ukb-b-20261	461066	rs12333760	7	99185406	C	T	9.90011e-10	-0.00828091	0.00135516	0.165187	37.3399
Ever smoked || id:ukb-b-20261	461066	rs12450028	17	2207425	T	C	6.29999e-09	0.0061305	0.00105543	0.34525	33.7389
Ever smoked || id:ukb-b-20261	461066	rs1246265	9	86761745	C	T	2.90001e-08	0.00606934	0.00109368	0.69544	30.7964
Ever smoked || id:ukb-b-20261	461066	rs12902636	15	47971451	T	C	3.69999e-09	-0.00594352	0.00100783	0.502529	34.7785
Ever smoked || id:ukb-b-20261	461066	rs13001103	2	50725152	G	C	1.89998e-08	-0.00568156	0.00101141	0.465892	31.5558
Ever smoked || id:ukb-b-20261	461066	rs13162305	5	12122698	T	A	2.19999e-08	0.00599007	0.00107096	0.335129	31.2835
Ever smoked || id:ukb-b-20261	461066	rs1322525	6	19093152	G	A	9.09997e-10	0.00638877	0.0010432	0.36713	37.5057
Ever smoked || id:ukb-b-20261	461066	rs1324481	1	33892964	G	T	1.6e-10	0.00689667	0.00107876	0.681417	40.8721
Ever smoked || id:ukb-b-20261	461066	rs13246563	7	3438243	G	C	5.19996e-11	-0.0066311	0.00100999	0.544302	43.1057
Ever smoked || id:ukb-b-20261	461066	rs13246563	7	3438243	G	C	5.19996e-11	-0.0066311	0.00100999	0.544302	43.1057
Ever smoked || id:ukb-b-20261	461066	rs1363101	5	103941070	G	T	9.29994e-09	-0.00576905	0.00100464	0.520698	32.9751
Ever smoked || id:ukb-b-20261	461066	rs1373178	18	49967811	G	T	1.2e-09	-0.00624613	0.00102739	0.594204	36.9615
Ever smoked || id:ukb-b-20261	461066	rs150294	15	89931148	G	A	2.09991e-13	-0.00755197	0.00102857	0.401317	53.9077
Ever smoked || id:ukb-b-20261	461066	rs1549212	5	166996722	T	C	1.79999e-10	-0.00662977	0.00103902	0.626251	40.7143
Ever smoked || id:ukb-b-20261	461066	rs1718705	3	61823653	C	G	2.5e-09	0.00646178	0.00108421	0.317331	35.5202
Ever smoked || id:ukb-b-20261	461066	rs17584022	11	59190650	A	G	2.69998e-09	-0.00659301	0.00110867	0.288018	35.364
Ever smoked || id:ukb-b-20261	461066	rs1876066	10	10040774	C	T	1.89998e-08	-0.00569426	0.00101351	0.497781	31.5658
Ever smoked || id:ukb-b-20261	461066	rs1899896	8	93201036	T	C	5.50047e-11	0.00723263	0.00110301	0.297037	42.9964
Ever smoked || id:ukb-b-20261	461066	rs2155292	11	112910783	G	A	1.99986e-46	0.0147459	0.00103067	0.387722	204.692
Ever smoked || id:ukb-b-20261	461066	rs2175207	10	87357738	G	A	2.90001e-08	0.00760405	0.00137126	0.159486	30.7502
Ever smoked || id:ukb-b-20261	461066	rs2183573	21	40574305	G	A	9.20005e-09	-0.0058352	0.00101582	0.572269	32.9971
Ever smoked || id:ukb-b-20261	461066	rs2516436	6	31419877	G	C	1.2e-08	-0.00572808	0.00100531	0.527401	32.4651
Ever smoked || id:ukb-b-20261	461066	rs28809490	22	46414043	A	G	5.89997e-09	-0.00633021	0.00108783	0.309077	33.862
Ever smoked || id:ukb-b-20261	461066	rs303753	18	21074922	A	G	1.09999e-08	-0.00607647	0.00106424	0.346408	32.6003
Ever smoked || id:ukb-b-20261	461066	rs34335016	1	154144681	T	A	2.19999e-08	-0.00863658	0.00154322	0.12052	31.3203
Ever smoked || id:ukb-b-20261	461066	rs35498642	3	85928634	T	C	1.29999e-09	-0.00624463	0.00102836	0.392512	36.8741
Ever smoked || id:ukb-b-20261	461066	rs35892365	8	26280685	T	C	2e-08	-0.00670967	0.00119592	0.243677	31.4772
Ever smoked || id:ukb-b-20261	461066	rs3783177	13	101151360	G	T	7.29995e-10	-0.00728636	0.00118308	0.238285	37.9307
Ever smoked || id:ukb-b-20261	461066	rs3790286	20	19655938	C	T	3.40001e-08	0.00559103	0.00101284	0.542753	30.4719
Ever smoked || id:ukb-b-20261	461066	rs41513151	7	121962809	A	G	2.80001e-09	0.00725566	0.00122102	0.216228	35.3107
Ever smoked || id:ukb-b-20261	461066	rs4422110	2	146114898	T	C	1.50003e-18	-0.00884447	0.00100653	0.534619	77.2126
Ever smoked || id:ukb-b-20261	461066	rs465646	6	111620758	A	G	1.29987e-17	-0.0117393	0.0013743	0.84077	72.9658
Ever smoked || id:ukb-b-20261	461066	rs4680392	3	157404329	C	T	9.59997e-09	0.00615747	0.00107329	0.673873	32.9131
Ever smoked || id:ukb-b-20261	461066	rs4856598	3	85650790	C	A	1.20005e-15	-0.00839393	0.00104871	0.62769	64.0646
Ever smoked || id:ukb-b-20261	461066	rs528301	2	45154908	A	G	5.10035e-14	0.00759775	0.00100892	0.554847	56.7093
Ever smoked || id:ukb-b-20261	461066	rs529206	11	132213460	T	C	1.40001e-08	-0.00585495	0.00103212	0.589177	32.1799
Ever smoked || id:ukb-b-20261	461066	rs55864295	4	70512801	G	A	1.09999e-08	-0.00737455	0.00129114	0.185129	32.6229
Ever smoked || id:ukb-b-20261	461066	rs56166763	4	140943169	C	G	2.30001e-08	-0.00582081	0.00104103	0.368511	31.2636
Ever smoked || id:ukb-b-20261	461066	rs58400863	4	31184484	A	G	2.69998e-09	-0.00632706	0.00106405	0.341099	35.3572
Ever smoked || id:ukb-b-20261	461066	rs61785503	1	50458443	T	C	2.5e-09	0.00704819	0.00118258	0.23512	35.5216
Ever smoked || id:ukb-b-20261	461066	rs6265	11	27679916	T	C	6.70039e-11	-0.00837849	0.00128362	0.18847	42.6046
Ever smoked || id:ukb-b-20261	461066	rs6438208	3	114170272	A	G	4.79999e-08	-0.00655943	0.00120129	0.25141	29.815
Ever smoked || id:ukb-b-20261	461066	rs6499595	16	72934443	C	G	1.79999e-10	-0.00654215	0.00102622	0.397268	40.6404
Ever smoked || id:ukb-b-20261	461066	rs67716713	2	104267572	A	C	4.00037e-13	-0.00728581	0.00100396	0.488327	52.6649
Ever smoked || id:ukb-b-20261	461066	rs7014143	8	21587997	C	A	2.39999e-08	0.00602856	0.00108012	0.586417	31.1517
Ever smoked || id:ukb-b-20261	461066	rs7024687	9	3174579	G	A	1e-08	-0.00582717	0.00101691	0.522154	32.8359
Ever smoked || id:ukb-b-20261	461066	rs71580759	5	87770123	C	T	1.7e-08	-0.00681164	0.00120836	0.222323	31.7767
Ever smoked || id:ukb-b-20261	461066	rs7162423	15	74052756	T	C	2.69998e-08	-0.00561656	0.00101048	0.444196	30.8947
Ever smoked || id:ukb-b-20261	461066	rs7216173	17	51891405	T	A	5.60003e-09	-0.00718666	0.00123277	0.781979	33.9851
Ever smoked || id:ukb-b-20261	461066	rs72706955	9	23818916	T	C	4.20001e-08	-0.00770884	0.00140594	0.150042	30.0637
Ever smoked || id:ukb-b-20261	461066	rs73058737	3	34532026	T	G	3.29997e-08	0.00615596	0.00111382	0.288033	30.5464
Ever smoked || id:ukb-b-20261	461066	rs75174460	12	133486532	C	T	2.19999e-08	0.0107765	0.00192612	0.075101	31.3031
Ever smoked || id:ukb-b-20261	461066	rs7572027	2	226286009	T	C	3.40001e-08	0.00709608	0.00128534	0.81255	30.4789
Ever smoked || id:ukb-b-20261	461066	rs7585579	2	60024857	G	C	1.79999e-10	0.00647236	0.00101421	0.492074	40.7256
Ever smoked || id:ukb-b-20261	461066	rs75919030	17	50193197	C	T	2.90001e-09	-0.0067996	0.00114564	0.262188	35.2264
Ever smoked || id:ukb-b-20261	461066	rs763053	16	735921	C	T	2.90001e-12	-0.00842129	0.00120641	0.225654	48.7265
Ever smoked || id:ukb-b-20261	461066	rs7758291	6	129346046	C	A	2.39999e-08	0.00602251	0.0010797	0.684258	31.1134
Ever smoked || id:ukb-b-20261	461066	rs77878475	16	18058548	A	T	4.90004e-10	-0.0116695	0.00187524	0.084235	38.7248
Ever smoked || id:ukb-b-20261	461066	rs7870475	9	128134034	C	T	1.79999e-08	0.00565884	0.00100528	0.475284	31.6868
Ever smoked || id:ukb-b-20261	461066	rs7901348	10	63679281	G	T	3.09999e-09	-0.00602763	0.00101703	0.551902	35.1256
Ever smoked || id:ukb-b-20261	461066	rs7969559	12	69655167	G	A	2.59998e-08	-0.0062217	0.00111792	0.720249	30.9738
Ever smoked || id:ukb-b-20261	461066	rs899632	4	57749347	C	T	9.8992e-12	-0.00702938	0.00103262	0.389049	46.3395
Ever smoked || id:ukb-b-20261	461066	rs904592	3	25193102	T	C	1.89998e-08	0.00569212	0.00101322	0.482639	31.5601
Ever smoked || id:ukb-b-20261	461066	rs905871	11	4661285	G	A	3.69999e-08	-0.00583757	0.00106085	0.339517	30.2799
Ever smoked || id:ukb-b-20261	461066	rs9375371	6	98751680	A	G	4.60002e-10	0.00706813	0.00113438	0.269366	38.8231
Ever smoked || id:ukb-b-20261	461066	rs9423279	10	125680419	G	C	5.89997e-09	-0.00627277	0.00107762	0.656563	33.8833
Ever smoked || id:ukb-b-20261	461066	rs9597810	13	59264524	G	C	4.30002e-08	-0.00587358	0.0010721	0.327261	30.0147
Ever smoked || id:ukb-b-20261	461066	rs9835772	3	85766025	T	A	2e-08	0.00656167	0.0011694	0.243671	31.4848
Ever smoked || id:ukb-b-20261	461066	rs9845144	3	184056716	A	G	8.79995e-09	0.0065577	0.00114003	0.272671	33.0879

## Sheet: Table7
exposure	samplesize	SNP	chr	pos	effect_allele	other_allele	pval	beta	se	eaf	FSTAT
smoking initiation || id:ieu-b-4877	632802	rs134529	22	28781758	C	T	4.84998e-08	-0.019984	0.00366078	0.349	29.8
smoking initiation || id:ieu-b-4877	632802	rs4781977	16	17572674	C	T	4.54004e-08	-0.0238668	0.00436473	0.205	29.9001
smoking initiation || id:ieu-b-4877	632802	rs9540729	13	66947124	T	A	3.81997e-08	-0.0195522	0.00355789	0.501	30.1999
smoking initiation || id:ieu-b-4877	632802	rs76214862	14	29500130	C	A	3.98997e-08	-0.0249903	0.00454745	0.202	30.1999
smoking initiation || id:ieu-b-4877	632802	rs4759228	12	56508409	C	G	3.57998e-08	-0.0216913	0.00393413	0.27	30.3999
smoking initiation || id:ieu-b-4877	632802	rs2107300	2	200937901	G	C	3.27002e-08	-0.027201	0.00492533	0.845	30.4998
smoking initiation || id:ieu-b-4877	632802	rs9423279	10	125680419	G	C	3.21004e-08	-0.0205132	0.00370828	0.641	30.5999
smoking initiation || id:ieu-b-4877	632802	rs6433897	2	182034448	C	T	3.16002e-08	0.0224483	0.00405809	0.754	30.6001
smoking initiation || id:ieu-b-4877	632802	rs1869243	3	5724536	C	T	2.97002e-08	0.0197411	0.00356289	0.481	30.6999
smoking initiation || id:ieu-b-4877	632802	rs2046850	1	210304319	T	C	3.02998e-08	-0.0248139	0.00447842	0.187	30.7
smoking initiation || id:ieu-b-4877	632802	rs66680800	3	85985324	T	G	2.83002e-08	-0.0202716	0.00365268	0.397	30.8001
smoking initiation || id:ieu-b-4877	632802	rs117143374	21	40555561	C	T	2.76001e-08	0.0292897	0.00526909	0.12	30.8999
smoking initiation || id:ieu-b-4877	632802	rs72896886	18	42632652	C	G	2.74998e-08	-0.0268885	0.00483712	0.144	30.9
smoking initiation || id:ieu-b-4877	632802	rs12545053	8	65073605	G	A	2.43002e-08	0.0202808	0.00363668	0.397	31.0999
smoking initiation || id:ieu-b-4877	632802	rs11658881	17	2072949	G	A	2.43002e-08	0.0201357	0.00361066	0.418	31.0999
smoking initiation || id:ieu-b-4877	632802	rs4785836	16	65604652	C	T	2.26001e-08	-0.0204704	0.00365894	0.398	31.2997
smoking initiation || id:ieu-b-4877	632802	rs11078713	17	7795972	G	A	2.22998e-08	-0.0201721	0.00360561	0.454	31.2999
smoking initiation || id:ieu-b-4877	632802	rs3800227	6	108994161	G	A	1.93001e-08	0.0228121	0.00405809	0.701	31.5999
smoking initiation || id:ieu-b-4877	632802	rs10260968	7	1889773	A	G	1.75001e-08	-0.0203218	0.00360938	0.597	31.6999
smoking initiation || id:ieu-b-4877	632802	rs10114490	9	11070165	A	G	1.81001e-08	-0.0255148	0.00453171	0.198	31.7
smoking initiation || id:ieu-b-4877	632802	rs4523689	11	7950797	G	A	1.54999e-08	-0.0206091	0.00364321	0.408	31.9999
smoking initiation || id:ieu-b-4877	632802	rs7929518	11	85980958	G	A	1.55998e-08	0.0242377	0.00428466	0.765	31.9999
smoking initiation || id:ieu-b-4877	632802	rs7224742	17	30657058	T	C	1.43001e-08	-0.0207099	0.00365532	0.595	32.0999
smoking initiation || id:ieu-b-4877	632802	rs4674993	2	226332033	G	A	1.31999e-08	-0.0252122	0.00443619	0.207	32.2998
smoking initiation || id:ieu-b-4877	632802	rs2631024	8	91995577	G	A	1.17999e-08	-0.0229645	0.00402823	0.737	32.5001
smoking initiation || id:ieu-b-4877	632802	rs222449	6	52916062	T	A	1.07999e-08	-0.0253208	0.00442796	0.793	32.6999
smoking initiation || id:ieu-b-4877	632802	rs6508144	18	50026142	G	C	7.97003e-09	-0.0206935	0.00358602	0.563	33.2998
smoking initiation || id:ieu-b-4877	632802	rs10905461	10	8803551	C	T	7.35005e-09	-0.0239554	0.00414505	0.718	33.4
smoking initiation || id:ieu-b-4877	632802	rs1160685	4	94052854	G	C	7.19996e-09	0.0207724	0.00358893	0.478	33.4998
smoking initiation || id:ieu-b-4877	632802	rs1971318	12	121389500	T	C	7.05992e-09	0.0285074	0.00492533	0.141	33.4999
smoking initiation || id:ieu-b-4877	632802	rs10498846	6	67405337	T	C	6.62003e-09	0.0206103	0.00355561	0.473	33.6
smoking initiation || id:ieu-b-4877	632802	rs9835772	3	85766025	T	A	6.32004e-09	0.0240472	0.00414237	0.235	33.7
smoking initiation || id:ieu-b-4877	632802	rs11057005	12	16748721	G	A	4.84998e-09	-0.0209298	0.00357892	0.43	34.1999
smoking initiation || id:ieu-b-4877	632802	rs10279261	7	133589846	A	G	5e-09	-0.0214194	0.00366263	0.619	34.2001
smoking initiation || id:ieu-b-4877	632802	rs962625	4	28473524	G	A	4.36999e-09	0.0237181	0.00403803	0.24	34.5
smoking initiation || id:ieu-b-4877	632802	rs2378662	9	86707289	A	G	4.15997e-09	0.0209482	0.00356645	0.556	34.5001
smoking initiation || id:ieu-b-4877	632802	rs1555445	20	31175258	T	A	3.64998e-09	0.0225548	0.0038234	0.337	34.7998
smoking initiation || id:ieu-b-4877	632802	rs7322872	13	100548329	T	C	3.57998e-09	-0.0255713	0.00433474	0.782	34.7999
smoking initiation || id:ieu-b-4877	632802	rs3801289	7	96638267	C	A	3.73999e-09	-0.0220618	0.00373982	0.351	34.8
smoking initiation || id:ieu-b-4877	632802	rs11712680	3	75009019	C	A	3.51002e-09	-0.0270476	0.00457843	0.174	34.8998
smoking initiation || id:ieu-b-4877	632802	rs6669839	1	50625979	T	C	3.36001e-09	0.0260041	0.0043955	0.204	34.9998
smoking initiation || id:ieu-b-4877	632802	rs6893752	5	60374912	G	A	3.24997e-09	-0.0240995	0.00407356	0.766	34.9999
smoking initiation || id:ieu-b-4877	632802	rs3904512	13	38357471	A	G	3.22998e-09	-0.0211589	0.0035765	0.429	35
smoking initiation || id:ieu-b-4877	632802	rs1385108	5	154839646	T	C	2.99999e-09	0.0246617	0.00415673	0.239	35.1999
smoking initiation || id:ieu-b-4877	632802	rs7197072	16	717085	T	C	2.77e-09	-0.0247672	0.0041686	0.238	35.2998
smoking initiation || id:ieu-b-4877	632802	rs301805	1	8481016	G	T	2.80001e-09	0.0214679	0.00361329	0.559	35.2998
smoking initiation || id:ieu-b-4877	632802	rs35702515	2	137542847	T	G	2.43002e-09	0.0252442	0.00423093	0.162	35.6
smoking initiation || id:ieu-b-4877	632802	rs76608582	19	4474725	A	C	1.93999e-09	-0.0495575	0.00825958	0.0389	35.9999
smoking initiation || id:ieu-b-4877	632802	rs7585579	2	60024857	G	C	1.88001e-09	0.0223996	0.0037281	0.505	36.0997
smoking initiation || id:ieu-b-4877	632802	rs1050847	16	87443734	T	C	1.67001e-09	-0.0216231	0.00358893	0.505	36.2998
smoking initiation || id:ieu-b-4877	632802	rs993700	4	67825894	C	T	1.52999e-09	-0.025928	0.00429163	0.766	36.4999
smoking initiation || id:ieu-b-4877	632802	rs11872397	18	72535282	A	G	1.43001e-09	-0.0247725	0.00409477	0.252	36.5998
smoking initiation || id:ieu-b-4877	632802	rs12333760	7	99185406	C	T	1.43999e-09	-0.0290467	0.00480127	0.204	36.5999
smoking initiation || id:ieu-b-4877	632802	rs12112638	7	69735251	G	A	1.33999e-09	-0.024526	0.00404299	0.275	36.7999
smoking initiation || id:ieu-b-4877	632802	rs4543592	9	3014254	C	T	7.46002e-10	0.0219314	0.00356244	0.468	37.8997
smoking initiation || id:ieu-b-4877	632802	rs7969559	12	69655167	G	A	7.31004e-10	-0.0243756	0.00395946	0.688	37.8998
smoking initiation || id:ieu-b-4877	632802	rs12025237	1	154205120	C	A	6.52004e-10	-0.0329992	0.00533915	0.124	38.1998
smoking initiation || id:ieu-b-4877	632802	rs72789632	5	106834363	T	C	5.01996e-10	-0.0328856	0.00528628	0.12	38.6999
smoking initiation || id:ieu-b-4877	632802	rs12632110	3	50224225	G	A	4.78002e-10	-0.0233768	0.00375292	0.647	38.7999
smoking initiation || id:ieu-b-4877	632802	rs2140114	7	3407568	T	C	4.70002e-10	-0.0232591	0.00373402	0.518	38.7999
smoking initiation || id:ieu-b-4877	632802	rs12042107	1	91196176	C	T	4.21998e-10	-0.0222834	0.0035682	0.527	38.9999
smoking initiation || id:ieu-b-4877	632802	rs13145728	4	140927812	C	G	2.13998e-10	-0.0232512	0.00366263	0.358	40.2998
smoking initiation || id:ieu-b-4877	632802	rs12441907	15	83922387	A	C	1.06001e-10	-0.0292051	0.00452262	0.186	41.7
smoking initiation || id:ieu-b-4877	632802	rs12186738	5	103816655	T	G	3.41979e-11	-0.0332644	0.00502051	0.154	43.8998
smoking initiation || id:ieu-b-4877	632802	rs1154693	3	117804154	G	A	3.12033e-11	0.0326217	0.00491232	0.856	44.1
smoking initiation || id:ieu-b-4877	632802	rs1445649	2	155682556	C	T	1.67996e-11	0.0239932	0.00356484	0.525	45.2997
smoking initiation || id:ieu-b-4877	632802	rs7555507	1	73766037	T	C	1.13999e-11	-0.0241444	0.00355604	0.496	46.0997
smoking initiation || id:ieu-b-4877	632802	rs1899896	8	93201036	T	C	1.03992e-11	0.0264481	0.00388691	0.286	46.2997
smoking initiation || id:ieu-b-4877	632802	rs10001365	4	147797214	A	G	6.64967e-12	-0.0249918	0.00364155	0.405	47.1
smoking initiation || id:ieu-b-4877	632802	rs6265	11	27679916	T	C	3.76964e-12	-0.0317863	0.00457843	0.203	48.1998
smoking initiation || id:ieu-b-4877	632802	rs9401770	6	98748008	A	G	3.46976e-12	0.0277307	0.003986	0.273	48.4
smoking initiation || id:ieu-b-4877	632802	rs4236259	7	1708080	G	T	3.34965e-12	-0.0247689	0.00355661	0.499	48.4998
smoking initiation || id:ieu-b-4877	632802	rs10159545	10	21766969	G	C	1.83992e-12	0.0262501	0.00372727	0.375	49.5997
smoking initiation || id:ieu-b-4877	632802	rs7921378	10	63674885	C	G	8.26038e-13	-0.0254601	0.00355815	0.463	51.2
smoking initiation || id:ieu-b-4877	632802	rs2186122	1	66470206	T	A	3.60994e-13	0.0260573	0.00358602	0.561	52.7998
smoking initiation || id:ieu-b-4877	632802	rs6728726	2	623976	C	T	6.72977e-14	0.0354486	0.00473279	0.829	56.0999
smoking initiation || id:ieu-b-4877	632802	rs4044321	5	166989513	G	A	6.07995e-14	-0.0278417	0.00371058	0.642	56.2998
smoking initiation || id:ieu-b-4877	632802	rs13261666	8	59814666	T	G	3.90032e-14	-0.0268946	0.00355604	0.522	57.1999
smoking initiation || id:ieu-b-4877	632802	rs10233018	7	117523709	G	A	2.74979e-14	0.027069	0.00355741	0.503	57.8996
smoking initiation || id:ieu-b-4877	632802	rs4352629	5	87756821	T	C	1.22011e-14	-0.0275284	0.00356881	0.492	59.4996
smoking initiation || id:ieu-b-4877	632802	rs12474587	2	162802993	T	G	1.24997e-14	0.0276329	0.00358234	0.404	59.5001
smoking initiation || id:ieu-b-4877	632802	rs12356821	10	104563808	C	G	6.27047e-15	0.03937	0.0050491	0.14	60.7997
smoking initiation || id:ieu-b-4877	632802	rs578584	2	45143175	T	A	1.50003e-15	0.0286801	0.00359627	0.605	63.5997
smoking initiation || id:ieu-b-4877	632802	rs266047	2	104088751	A	G	3.3597e-16	-0.0305098	0.00373855	0.529	66.5995
smoking initiation || id:ieu-b-4877	632802	rs1435741	15	47935843	A	G	2.63998e-16	0.0294151	0.00359095	0.425	67.0997
smoking initiation || id:ieu-b-4877	632802	rs1565735	8	27426077	A	T	3.41979e-17	-0.037618	0.0044613	0.212	71.0996
smoking initiation || id:ieu-b-4877	632802	rs240963	6	111644332	C	T	2.16023e-17	-0.0410444	0.00483712	0.836	72
smoking initiation || id:ieu-b-4877	632802	rs6788098	3	85624131	T	A	1.90985e-17	-0.0313461	0.00368905	0.623	72.1999
smoking initiation || id:ieu-b-4877	632802	rs3001723	1	44037685	A	G	8.12082e-18	0.0335118	0.0038983	0.321	73.8999
smoking initiation || id:ieu-b-4877	632802	rs13030994	2	146143090	A	G	3.56041e-24	0.0360925	0.0035563	0.485	103
smoking initiation || id:ieu-b-4877	632802	rs7938812	11	112911004	G	T	2.71019e-33	0.0437914	0.00363668	0.424	144.999

## Sheet: Table8
exposure	samplesize	SNP	chr	pos	effect_allele	other_allele	pval	beta	se	eaf	FSTAT
Current tobacco smoking || id:ukb-a-16	337030	rs10891481	11	112830562	G	A	5.81956e-10	0.00844556	0.00136319	0.382581	38.3832
Current tobacco smoking || id:ukb-a-16	337030	rs11096777	4	35568903	C	T	7.36784e-09	0.00990335	0.00171265	0.182487	33.4368
Current tobacco smoking || id:ukb-a-16	337030	rs11210887	1	44076019	A	G	3.46338e-11	-0.00954999	0.00144137	0.700334	43.8988
Current tobacco smoking || id:ukb-a-16	337030	rs113382419	9	136463019	A	C	3.99945e-24	0.0212683	0.00209903	0.11211	102.666
Current tobacco smoking || id:ukb-a-16	337030	rs1549214	5	166997007	C	T	5.62341e-11	-0.00902835	0.00137761	0.640579	42.9498
Current tobacco smoking || id:ukb-a-16	337030	rs17730481	8	9276163	A	G	1.71333e-09	0.00856343	0.00142178	0.323033	36.2767
Current tobacco smoking || id:ukb-a-16	337030	rs3773814	3	130715748	C	A	4.04138e-08	0.0100866	0.00183756	0.153285	30.1303
Current tobacco smoking || id:ukb-a-16	337030	rs4809542	20	61986787	G	C	3.32376e-09	0.0153361	0.00259278	0.0703071	34.9861
Current tobacco smoking || id:ukb-a-16	337030	rs56113850	19	41353107	C	T	1.36678e-17	-0.0114122	0.00133658	0.577736	72.9031
Current tobacco smoking || id:ukb-a-16	337030	rs6062496	20	62329099	A	G	3.38673e-08	0.00731762	0.00132558	0.544683	30.4737
Current tobacco smoking || id:ukb-a-16	337030	rs62474713	7	115060209	A	G	5.59629e-11	-0.00867869	0.00132411	0.498591	42.9593
Current tobacco smoking || id:ukb-a-16	337030	rs73227362	8	27415350	C	A	3.67012e-09	-0.00981941	0.00166471	0.195714	34.7929
Current tobacco smoking || id:ukb-a-16	337030	rs7726560	5	165696842	T	G	2.19872e-08	0.00745665	0.00133256	0.438569	31.312
Current tobacco smoking || id:ukb-a-16	337030	rs7807019	7	117543063	G	A	1.0274e-08	0.00759831	0.00132692	0.460379	32.79
Current tobacco smoking || id:ukb-a-16	337030	rs8033799	15	47681384	C	A	3.89753e-08	0.00891326	0.0016219	0.211359	30.2011
Current tobacco smoking || id:ukb-a-16	337030	rs9607805	22	41854446	T	C	2.26199e-10	0.00944438	0.00148904	0.727753	40.2283
